# Supplementary material for: Synergistic effect of bimetallic Cu:Ni nanoparticles for the efficient catalytic conversion of 4-nitrophenol
Source: Royal Society of Chemistry journal article supplement (doi:10.1039/c8nj05649h), 2019-01-01
Supplement: c8nj05649h1.pdf [file c8nj05649h1.pdf]

## Supplementary Information

### X-ray Diffraction

In order to confirm the presence of nickel, Cu<sub>75</sub>Ni<sub>25</sub> was annealed at 400 °C for 5hrs and the phase confirmation was done by XRD (Fig. S1). The XRD pattern clearly depicts the characteristic peaks of both monoclinic copper oxide (ICDD: 98-000-6038) and cubic nickel oxide (ICDD: 98-000-9032). This confirms the presence of nickel alloyed with copper in Cu<sub>75</sub>Ni<sub>25</sub> which on annealing oxidized to nickel oxide.

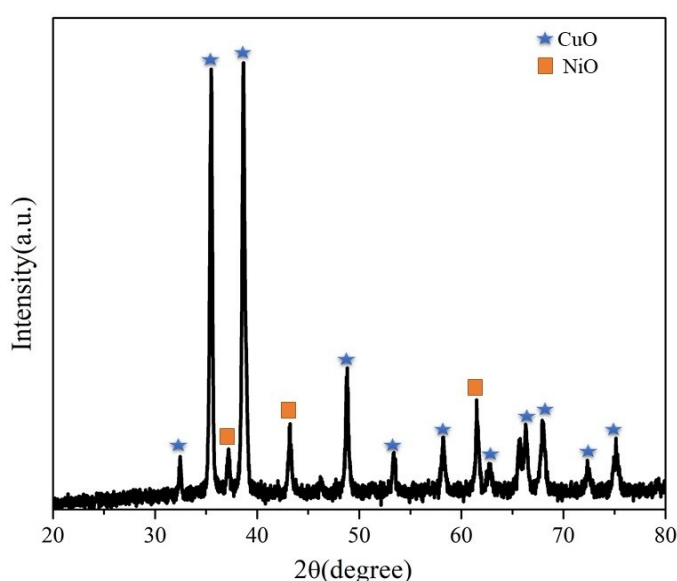

**Fig. S1** XRD pattern for Cu<sub>75</sub>Ni<sub>25</sub> sample annealed at 400 °C for 5hrs

### UV-visible Spectroscopy

To understand the synergistic effect in Cu<sub>75</sub>Ni<sub>25</sub> which arise from the atomic level mixing, we physically mixed Cu and Ni in the appropriate molar ratio to get the equivalent of Cu<sub>75</sub>Ni<sub>25</sub> (Cu<sub>75</sub>-Ni<sub>25</sub>) and tested the catalytic activity as per the procedure discussed in section 2.3. of the manuscript. We also tested with Cu having molar fraction equivalent to that in Cu<sub>75</sub>Ni<sub>25</sub> but without Ni (sample designated as Cu<sub>75</sub>). Fig. S2 shows the UV-visible spectroscopy regarding the catalytic activity of Cu<sub>75</sub>-Ni<sub>25</sub> (physically mixed), Cu<sub>75</sub>(75 wt. %) and the rate constant of the samples in comparison with Cu<sub>75</sub>Ni<sub>25</sub> and the calculated rate constant was

found to be  $\sim 0.8 \times 10^{-3} \text{ s}^{-1}$  for both the samples. In spite of the similar composition, physically mixed Cu75-Ni25 very poor catalytic activity in comparison to the bimetallic alloy (rate constant  $22.52 \times 10^{-3} \text{ s}^{-1}$ ). Formation of solid solution in Cu75Ni25 increases the scattering of electrons and increases the catalytic activity as discussed in the manuscript indicating the importance of catalyst structure than the composition.

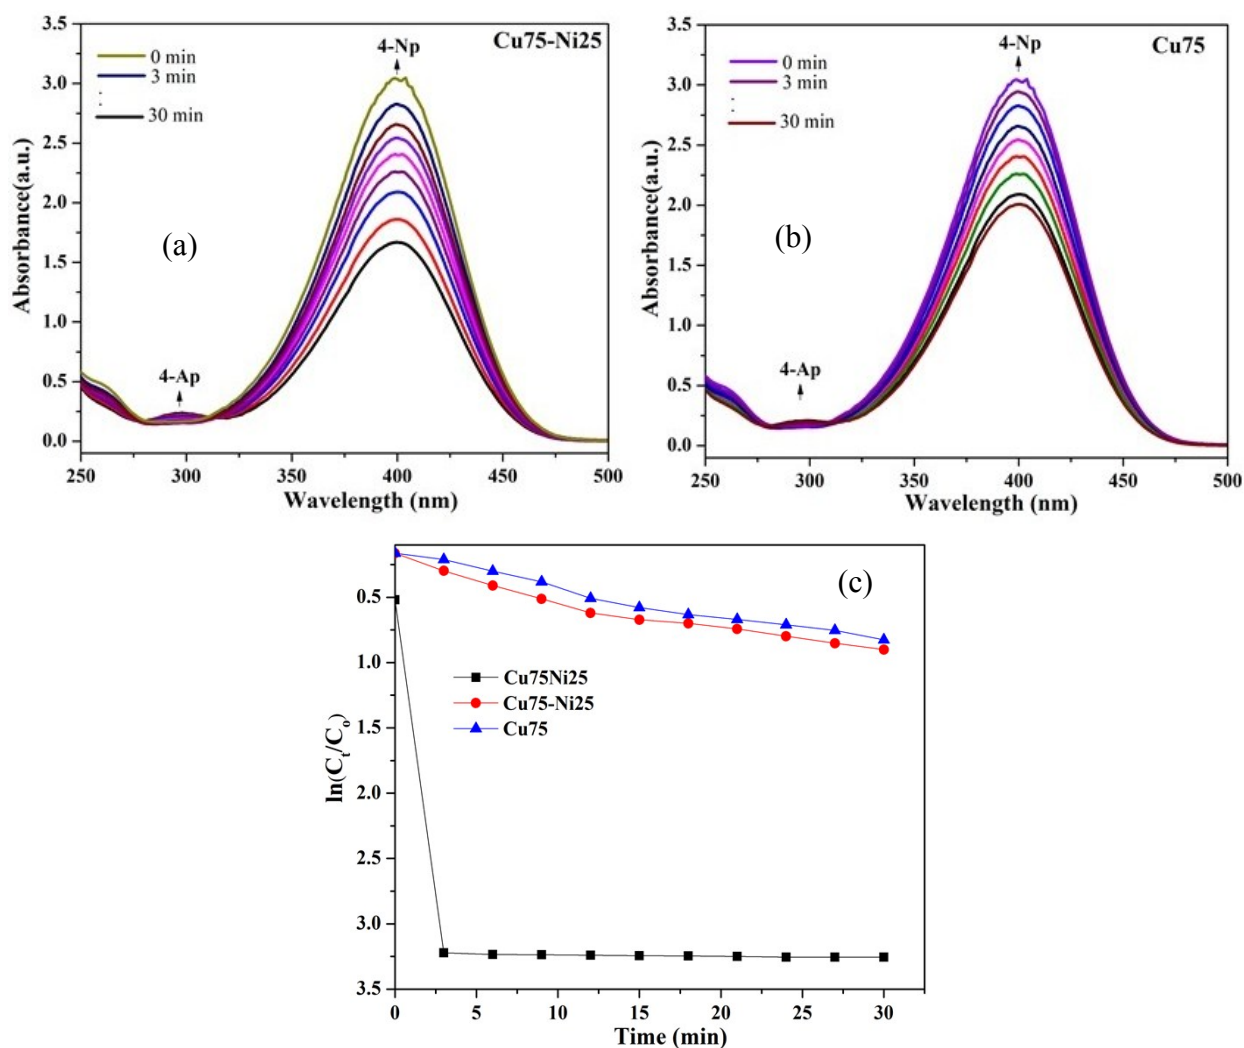

**Fig. S2** UV-visible spectroscopy of catalytic activity of (a) Cu75-Ni25 (b) Cu75 and (c) rate constant of Cu75Ni25, Cu75-Ni25 and Cu75.

**Table S1** Rate constant value of Cu75Ni25, Cu75-Ni25 and Cu75

| Sl .No | Sample Code                  | Rate Constant (s <sup>-1</sup> ) x 10 <sup>-3</sup> |
|--------|------------------------------|-----------------------------------------------------|
| 1      | Cu75Ni25 (as synthesised)    | 22.52                                               |
| 2      | Cu75-Ni25 (Physically mixed) | 0.855                                               |
| 3      | Cu75 (Copper 75 wt%)         | 0.828                                               |

### Recyclability test

Fig. S3 shows the recyclability test carried out upto six cycles of Cu75Ni25 which is recovered from first cycle using a magnet.

**Fig. S3** UV-Visible spectroscopy of Cu75Ni25 for 4-nitrophenol reduction after (a) 2 (b) 3 (c) 4 (d) 5 and (e) 6 cycles
